# Supplementary material for: Entomological Survey and Leishmania (Leishmania) mexicana Prevalence in Sand Fly Species during an Outbreak of Cutaneous Leishmaniasis in Quintana Roo State, Mexico
Source: MDPI journal article supplement (doi:10.3390/tropicalmed8100465), 2023-10-05
Supplement: s1 [file s1]

**Table S1.** Distribution of LCL cases in the municipalities of the state of Quintana Roo during the period 2020-2023. Data according to Health Services of the state of Quintana Roo.

| Municipality           | Year |      |      |            | Total | %      |
|------------------------|------|------|------|------------|-------|--------|
|                        | 2020 | 2021 | 2022 | April 2023 |       |        |
| Cozumel                | 0    | 0    | 0    | 1          | 1     | 0.06   |
| Felipe Carrillo Puerto | 4    | 58   | 157  | 201        | 420   | 27.22  |
| Isla Mujeres           | 0    | 0    | 4    | 0          | 4     | 0.26   |
| Othon P. Blanco        | 6    | 72   | 147  | 78         | 303   | 19.64  |
| Benito Juárez          | 1    | 18   | 90   | 112        | 221   | 14.32  |
| José María Morelos     | 5    | 28   | 78   | 22         | 133   | 8.62   |
| Lázaro Cárdenas        | 0    | 10   | 50   | 26         | 86    | 5.57   |
| Solidaridad            | 0    | 15   | 47   | 81         | 143   | 9.27   |
| Tulum                  | 0    | 22   | 67   | 43         | 132   | 8.55   |
| Bacalar                | 0    | 12   | 56   | 32         | 100   | 6.48   |
| <b>Total</b>           | 16   | 235  | 696  | 596        | 1543  | 100.00 |
